# Supplementary material for: E3-ubiquitin ligase TRIM6 aggravates myocardial ischemia/reperfusion injury via promoting STAT1-dependent cardiomyocyte apoptosis
Source: publisher site journal article supplement (doi:10.18632/aging.101995), 2019-06-06
Supplement: Supplementary file [file aging-v11i11-101995-supplementary-material-SD1.pdf]

**SUPPLEMENTARY MATERIALS**

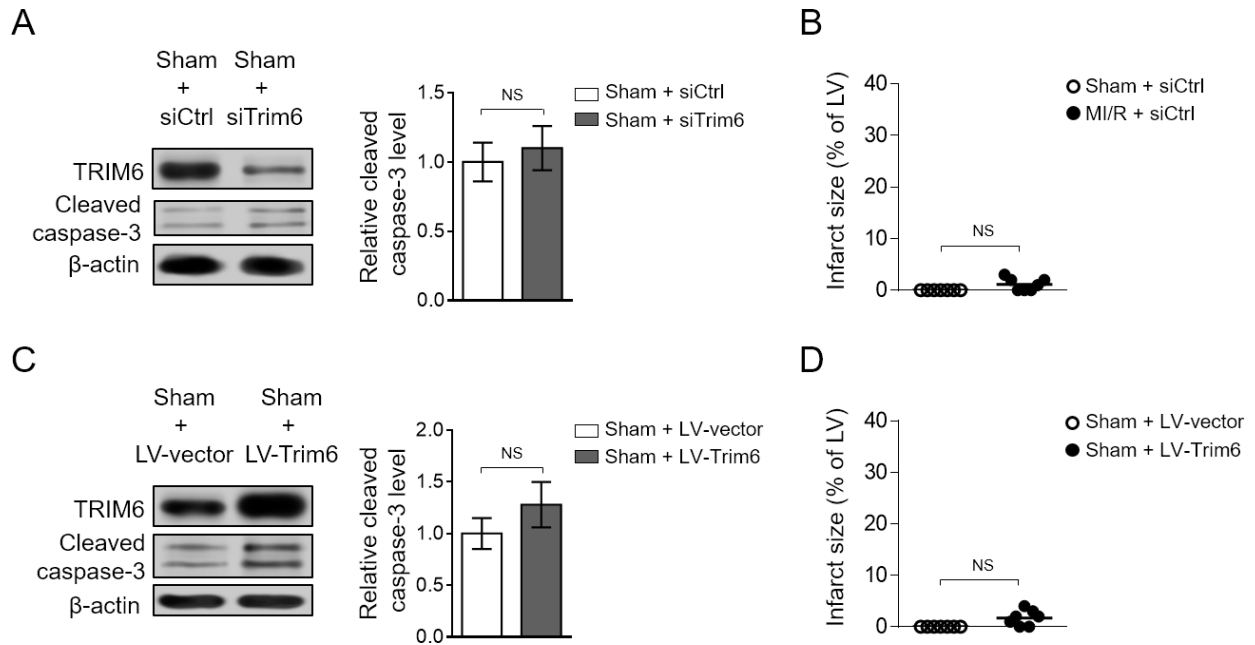

**Supplementary Figure 1. TRIM6 manipulation alone does not have obvious effects on the hearts of sham mice. (A–B)** The mouse heart was pre-transfected in vivo with control siRNA (siCtrl) or siRNA targeting Trim6 (siTrim6) for 48 hrs. Mice were then subjected to sham surgery. Each group contained 7 mice. At 24 hrs after reperfusion, the heart was harvested for analyses. **(A)** The protein levels of TRIM6 and cleaved caspase-3 in the heart were determined by Western blotting analysis.  $\beta$ -Actin was used a loading control. **(B)** The infarct size relative to the left ventricular of mid-myocardial cross sections of each group is shown. **(C–D)** The mouse heart was pre-infected in vivo with lentivirus expressing vector control (LV-vector) or Trim6 (LV-Trim6) for 48 hrs. Mice were then subjected to sham surgery. Each group contained 7 mice. At 24 hrs after reperfusion, the heart was harvested for analyzing protein expression **(C)** and infarct size **(D)** as described in **(A–B)**. All data are expressed as mean  $\pm$  SD (n = 7). NS, not significant.

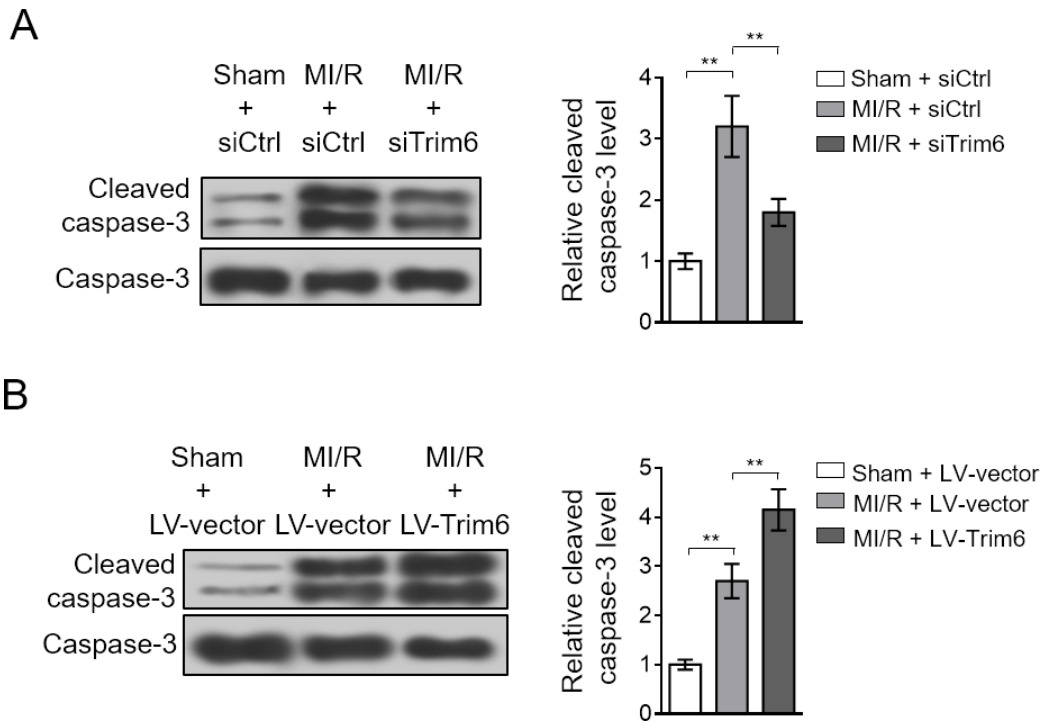

**Supplementary Figure 2. TRIM6 increases expression of cleaved caspase-3 after MI/R injury.** (A) The mouse heart was pre-transfected in vivo with control siRNA (siCtrl) or siRNA targeting Trim6 (siTrim6) for 48 hrs. Mice were then subjected to sham surgery or experimental MI/R. Each group contained 7 mice. At 24 hrs after reperfusion, the hearts were harvested for analyses. The protein expression of cleaved caspase-3 and caspase-3 was determined by Western blotting analysis. The representative images (left) and cleaved caspase-3/caspase-3 ratio relative to sham (right) are shown. (B) The mouse heart was pre-infected in vivo with lentivirus expressing vector control (LV-vector) or Trim6 (LV-Trim6) for 48 hrs. Mice were then subjected to sham surgery or experimental MI/R. Each group contained 7 mice. At 24 hrs after reperfusion, the hearts were harvested for analyses. The protein expression was analyzed as in (A). All data are expressed as mean  $\pm$  SD. \*\*,  $P < 0.01$ .
